# Supplementary material for: Facilitating informed decisions about breast cancer screening: development and evaluation of a web-based decision aid for women in their 40s
Source: Springer Nature journal article supplement (doi:10.1186/s12911-017-0423-7), 2017-03-21
Supplement: MOESM1 [file 12165038]

Additional file 1: Table S1 - IPDAS criteria

| <b>Content criteria: Does the decision aid...</b>                                                                                     | <b>Met fully</b> | <b>Met partially</b> |
|---------------------------------------------------------------------------------------------------------------------------------------|------------------|----------------------|
| <i>Provide information about options in sufficient detail for decision making?</i>                                                    |                  |                      |
| Describe the health condition                                                                                                         | x                |                      |
| List the options                                                                                                                      | x                |                      |
| List the option of doing nothing                                                                                                      | x                |                      |
| Describe the natural course without options                                                                                           |                  | x                    |
| Describe procedures                                                                                                                   | x                |                      |
| Describe positive features [benefits]                                                                                                 | x                |                      |
| Describe negative features of options                                                                                                 | x                |                      |
| Include chances of pos/neg outcomes                                                                                                   | x                |                      |
| Describe what test is designed to measure                                                                                             | x                |                      |
| Include changes of true pos, true neg, false pos, false neg results                                                                   | x                |                      |
| Describe possible next steps based on test result                                                                                     | x                |                      |
| Include chances the disease is found out without screening                                                                            | x                |                      |
| Describe detection/treatment that would never have caused problems if one was not screened                                            | x                |                      |
| <i>Present probabilities of outcomes in an unbiased and understandable way?</i>                                                       |                  |                      |
| Use event rates specifying the population and time period                                                                             | x                |                      |
| Compare outcome probabilities using the same denominator, time period, scale                                                          | x                |                      |
| Describe uncertainty around probabilities                                                                                             | x                |                      |
| Use visual diagrams                                                                                                                   | x                |                      |
| Use multiple methods to view probabilities                                                                                            | x                |                      |
| Allows the patient to select a way of viewing probabilities [words, numbers, diagrams]                                                | x                |                      |
| Allow patient to view probabilities based on their own situation [e.g. age]                                                           | x                |                      |
| Place probabilities in context of other events                                                                                        |                  | x                    |
| Use both positive and negative frames [e.g. showing both survival and death rates]                                                    | x                |                      |
| <i>Include methods for clarifying and expressing patients' values?</i>                                                                |                  |                      |
| Describe the procedures and outcomes to help patients imagine what it is like to experience their physical, emotional, social effects | x                |                      |
| Ask patients to consider which positive and negative features matter most                                                             | x                |                      |
| Suggest ways for patients to share what matters most with others                                                                      | x                |                      |
| <i>Include structures guidance in deliberation and communication?</i>                                                                 |                  |                      |
| Provide steps to make a decision                                                                                                      | x                |                      |
| Suggest ways to talk about the decision with a health professional                                                                    | x                |                      |
| Include tools [worksheet, question list] to discuss options with others                                                               | x                |                      |

| <b>Development criteria: Does the decision aid...</b>                                                                    | <b>Met fully</b> | <b>Met partially</b> |
|--------------------------------------------------------------------------------------------------------------------------|------------------|----------------------|
| <i>Present information in a balanced manner?</i>                                                                         |                  |                      |
| Able to compare positive/negative features of options                                                                    | x                |                      |
| Shows negative/positive features with equal detail [fonts, order, display of statistics]                                 | x                |                      |
| <i>Have a systematic development process?</i>                                                                            |                  |                      |
| Includes developers' credentials/qualifications                                                                          | x                |                      |
| Finds out what users [patients, practitioners] need to discuss options                                                   | x                |                      |
| Has peer review by patient/professional experts not involved in development and field testing                            | x                |                      |
| Is field tested with users (patients facing the decision; practitioners presenting options)                              | x                |                      |
| The field tests with users [patients, practitioners] show the decision aid is:                                           |                  |                      |
| Acceptable                                                                                                               | x                |                      |
| Balanced for undecided patients                                                                                          | x                |                      |
| Understood by those with limited reading skills (not target group)                                                       |                  | x                    |
| <i>Use up to date scientific evidence that is cited in a reference section or technical document?</i>                    |                  |                      |
| Provides references to evidence used                                                                                     | x                |                      |
| Report steps to find, appraise, summarize evidence                                                                       |                  | x                    |
| Report date of last update                                                                                               | x                |                      |
| Report how often patient decision aid is updated                                                                         | x                |                      |
| Describe quality of scientific evidence [including lack of evidence]                                                     | x                |                      |
| Uses evidence from studies of patients similar to those of target audience                                               | x                |                      |
| <i>Disclose conflicts of interest?</i>                                                                                   |                  |                      |
| Report source of funding to develop and distribute patient decision aid                                                  | x                |                      |
| Report whether authors or their affiliations stand to gain or lose by choices patients make after using the decision aid | x                |                      |
| <i>Use plain language?</i>                                                                                               |                  |                      |
| Is written at a level that can be understood by the majority of patients in the target group                             | x                |                      |
| Is written at a grade 8 equivalent level or less according to readability score [SMOG or FRY]                            | x                |                      |
| Provides ways to help patients understand information other than reading [audio, video, in-person discussion]            |                  | x                    |
